# Supplementary material for: PALS1-dependent modulations of mRNA profiles in MDCK II cells grown in non-confluent monolayers and three-dimensional cysts
Source: PubMed Central journal article supplement (PMC11607895; doi:10.1186/s12863-024-01284-0), 2024-11-29
Supplement: 12863_2024_1284_MOESM33_ESM.pdf [file 12863_2024_1284_MOESM33_ESM.pdf]

# Supplemental Data

PALS1-dependent modulations of mRNA profiles  
in MDCK II cells grown in non-confluent monolayers and  
3-dimensional cysts.

by

Klaus Schughart<sup>1, 2\*</sup>, Annika Möller-Kerutt<sup>3</sup>, Verena Höffken<sup>3</sup>, Pavel Nedvetsky<sup>4</sup>, Ann-Christin  
Groh<sup>3</sup>, Daniela Anne Braun<sup>3</sup>, Hermann Pavenstädt<sup>3</sup>, and Thomas Weide<sup>3</sup>

<sup>1</sup>) Institute of Virology Münster, University of Münster, 48149 Münster, Germany.

<sup>2</sup>) Department of Microbiology, Immunology and Biochemistry, University of Tennessee  
Health Science Center, Memphis, TN 38103, U.S.A.

<sup>3</sup>) University Hospital of Münster (UKM), Internal Medicine D (MedD), Dept. Molecular  
Nephrology, Münster, 48149, Germany

<sup>4</sup>) University Hospital of Münster (UKM), Internal Medicine D (MedD), Dept. Medical Cell  
Biology, Münster, 48149, Germany

Corresponding author:

Thomas Weide

University Hospital of Münster (UKM), Internal Medicine D (MedD), Dept. Molecular  
Nephrology, Münster, 48149, Germany

Email: [weidet@uni-muenster.de](mailto:weidet@uni-muenster.de)

## 1 **Table Of Content Supplemental Data**

### 2 **Supplemental Figures**

3 Fig. SF1: Preparation of mRNA samples for transcriptome analyses.

4

### 5 **Supplemental Tables**

|    |            |                                                                            |
|----|------------|----------------------------------------------------------------------------|
| 6  | Table ST1  | MDCK transcriptomes of wildtype, PALS1 knockout and the starting MDCK cell |
| 7  |            | pool.                                                                      |
| 8  | Table ST2A | Differential expressed genes (DEGs) of subset A (WT-3D vs WT-nc)           |
| 9  | Table ST2B | DEGs of subset B (KO-3D vs KO-nc)                                          |
| 10 | Table ST2C | DEGs of subset C (KO-3D vs WT-3D)                                          |
| 11 | Table ST2D | DEGs of subset D (KO-nc vs WT-nc)                                          |
| 12 | Table ST03 | Shared DEGs of subset A and subset B                                       |
| 13 | Table ST04 | Gene ontology biological processes (GO-BP) enrichment analysis for         |
| 14 |            | upregulated DEGs of subset A                                               |
| 15 | Table ST05 | GO-BP enrichment analysis for upregulated DEGs of subset B                 |
| 16 | Table ST06 | REACTOME analysis for upregulated DEGs of subset A                         |
| 17 | Table ST07 | REACTOME analysis for upregulated DEGs of subset B                         |
| 18 | Table ST08 | KEGG analysis for upregulated DEGs of subset A                             |
| 19 | Table ST09 | KEGG analysis for upregulated DEGs of subset B                             |
| 20 | Table ST10 | GO-BP enrichment analysis for downregulated DEGS of subset A               |
| 21 | Table ST11 | GO-BP enrichment analysis for downregulated DEGs of subset B               |
| 22 | Table ST12 | REACTOME analysis for downregulated DEGs of subset A                       |
| 23 | Table ST13 | REACTOME analysis for downregulated DEGs of subset B                       |
| 24 | Table ST14 | KEGG analysis for downregulated DEGs of subset A                           |
| 25 | Table ST15 | KEGG analysis for upregulated DEGs of subset B                             |
| 26 | Table ST16 | Shared DEGs of subset C and subset D                                       |
| 27 | Table ST17 | GO-BP enrichment analysis for upregulated DEGs of subset C                 |
| 28 | Table ST18 | GO-BP enrichment analysis for downregulated DEGs of subset C.              |
| 29 | Table ST19 | GO-BP enrichment analysis for upregulated DEGs of subset D                 |
| 30 | Table ST20 | GO-BP enrichment analysis for downregulated DEGs of subset D.              |
| 31 | Table ST21 | REACTOME analysis for upregulated DEGs of subset C                         |
| 32 | Table ST22 | REACTOME analysis for downregulated DEGs of subset C                       |
| 33 | Table ST23 | REACTOME analysis for upregulated DEGs of subset D                         |
| 34 | Table ST24 | REACTOME analysis for downregulated DEGs of subset D                       |
| 35 | Table ST25 | KEGG analysis for upregulated DEGs of subset C                             |
| 36 | Table ST26 | KEGG analysis for upregulated DEGs of subset C                             |
| 37 | Table ST27 | KEGG analysis for upregulated DEGs of subset D                             |
| 38 | Table ST28 | KEGG analysis for upregulated DEGs of subset D                             |
| 39 | Table ST29 | Gene lists: cell junction, cell polarity, and cell-ECM interaction         |
| 40 |            |                                                                            |

# 1 Supplemental Figures

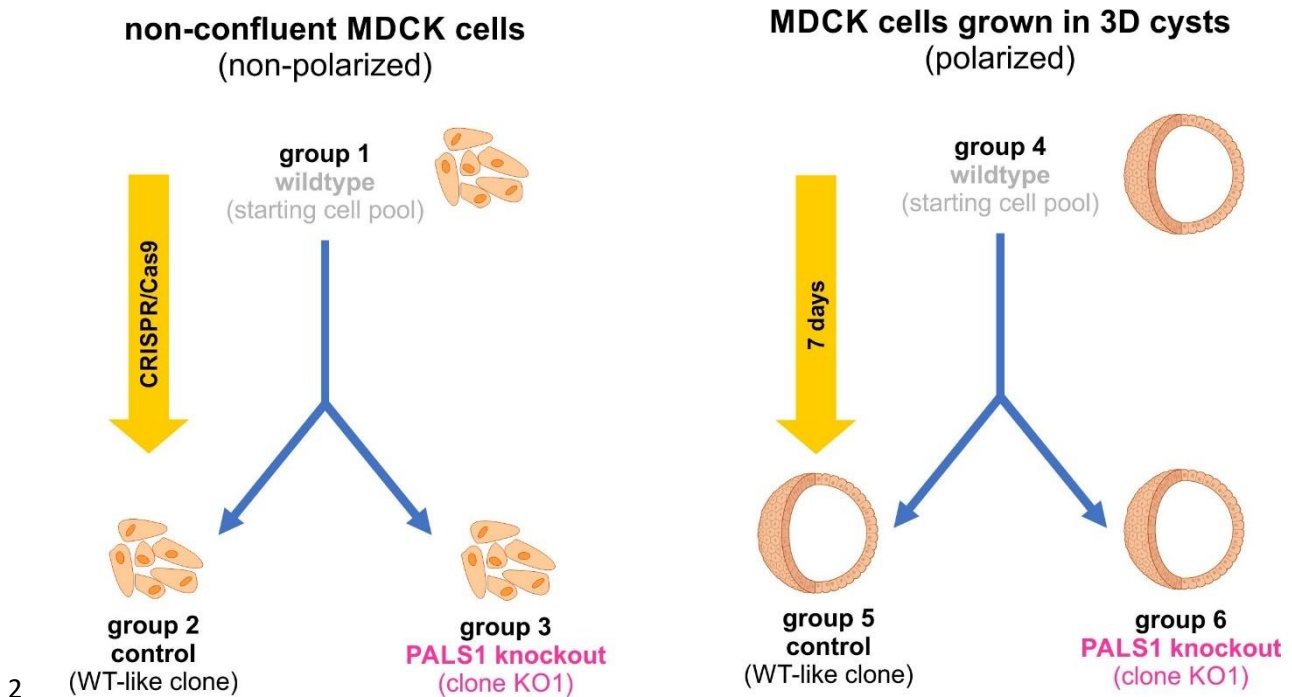

2

3

4 Fig. SF1: Preparation of mRNA samples for transcriptome analyses.

5 A: Scheme of used transcriptomes. Initially the analysis included six groups of transcriptomes samples: The first

6 three groups (1-3) are samples from cells grown under non-confluent conditions (upper panel). *group 1*:

7 transcriptomes derived from the starting pool of non-confluent MDCK II cells (wildtype non-confluent, n=4).

8 *group 2*: Samples derived from a clone that ran through a CRISPR/Cas9 but maintained a wildtype *PALS1* gene

9 (Ctr non-confluent, n=4). *group 3*: samples derived from a *PALS1* knockout clone (KO1 non-confluent, n=4) (Groh

10 et al., 2024). The next are three groups (4-6) are samples derived from cells grown for 7 days in 3D cysts. *group 4*:

11 3D-cyst from the MDCK starting pool (WT-nc, n=4). *group 5*: Samples derived from 3D cysts of the clone that run

12 through a CRISPR/Cas9 but maintained a wildtype *PALS1* gene (Ctr-3D, n=3). *group 6*: Samples derived from 3D

13 cysts of the KO1 clone (KO1 3D, n=3).

14

15

16

17

## 1 **Supplemental Tables (titles and descriptions)**

2

3 Table ST1 MDCK transcriptomes of wildtype, PALS1 knockout and the starting MDCK cell pool.

4 File name: ST01\_S1\_sample\_description\_030424.xlsx

5 Description of data: List of samples with sample ID from GEO and their description.

6

7 Table ST2A Differential expressed genes (DEGs) of subset A (WT-3D vs WT-nc)

8 File name: ST02A\_sbst7\_DESeq2\_DEG\_Ctr\_3D\_7d\_vs\_Ctr\_2D\_nconf\_011223

9 Description of data: see name of table

10

11 Table ST2B DEGs of subset B (KO-3D vs KO-nc)

12 File name: ST02B\_sbst7\_DESeq2\_DEG\_KO\_3D\_7d\_vs\_KO\_2D\_nconf\_011223

13 Description of data: see name of table

14

15 Table ST2C DEGs of subset C (KO-3D vs WT-3D)

16 File name: ST02C\_sbst7\_DESeq2\_DEG\_KO\_3D\_7d\_vs\_Ctr\_3D\_7d\_011223

17 Description of data: see name of table

18

19 Table ST2D DEGs of subset D (KO-nc vs WT-nc)

20 File name: ST02D\_sbst7\_DESeq2\_DEG\_KO\_2D\_nconf\_vs\_Ctr\_2D\_nconf\_140824

21 Description of data: see name of table

22

23 Table ST03 Shared DEGs of subset A and subset B

24 File name: ST03\_Shared DEGs of Subset A and B

25 Description of data: Analyses of common and different DEGs of total, up-, and downregulated DEGs of  
26 subset A and B, including TOP 20 up- and downregulated DEGS.

27

28 Table ST04 Gene ontology biological processes (GO-BP) enrichment analysis for upregulated DEGs  
29 of subset A

30 File name:

31 ST04\_UP\_EnrichR\_GO\_Biological\_Process\_2021\_sbst7\_Ctr\_3D\_7d\_vs\_Ctr\_2D\_nconf\_191223

32 Description of data: see name of table

33

34 Table ST05 GO-BP enrichment analysis for upregulated DEGs of subset B

35 File name:

36 ST05\_UP\_EnrichR\_GO\_Biological\_Process\_2021\_sbst7\_KO\_3D\_7d\_vs\_KO\_2D\_nconf\_191223

37 Description of data: see name of table

38

39 Table ST06 REACTOME analysis for upregulated DEGs of subset A

40 File name: ST06\_UP\_EnrichR\_Reactome\_2016\_sbst7\_Ctr\_3D\_7d\_vs\_Ctr\_2D\_nconf\_191223

41 Description of data: see name of table

42

43

1  
2 Table ST07 REACTOME analysis for upregulated DEGs of subset B  
3 File name: ST07\_UP\_EnrichR\_Reactome\_2016\_sbst7\_KO\_3D\_7d\_vs\_KO\_2D\_nconf\_191223  
4 Description of data: see name of table  
5  
6 Table ST08 KEGG analysis for upregulated DEGs of subset A  
7 ST08\_UP\_EnrichR\_KEGG\_2021\_Human\_sbst7\_Ctr\_3D\_7d\_vs\_Ctr\_2D\_nconf\_191223  
8 Description of data: see name of table  
9 Table ST09 KEGG analysis for upregulated DEGs of subset B  
10 ST09\_UP\_EnrichR\_KEGG\_2021\_Human\_sbst7\_KO\_3D\_7d\_vs\_KO\_2D\_nconf\_191223  
11 Description of data: see name of table  
12  
13 Table ST10 GO-BP enrichment analysis for downregulated DEGS of subset A  
14 File name:  
15 ST10\_DN\_EnrichR\_GO\_Biological\_Process\_2021\_sbst7\_Ctr\_3D\_7d\_vs\_Ctr\_2D\_nconf\_191223  
16 Description of data: see name of table  
17  
18 Table ST11 GO-BP enrichment analysis for downregulated DEGs of subset B  
19 File name:  
20 ST11\_DN\_EnrichR\_GO\_Biological\_Process\_2021\_sbst7\_KO\_3D\_7d\_vs\_KO\_2D\_nconf\_191223  
21 Description of data: see name of table  
22  
23 Table ST12 REACTOME analysis for downregulated DEGs of subset A  
24 File name: ST12\_DN\_EnrichR\_Reactome\_2016\_sbst7\_Ctr\_3D\_7d\_vs\_Ctr\_2D\_nconf\_191223  
25 Description of data: see name of table  
26  
27 Table ST13 REACTOME analysis for downregulated DEGs of subset B  
28 File name: ST13\_DN\_EnrichR\_Reactome\_2016\_sbst7\_KO\_3D\_7d\_vs\_KO\_2D\_nconf\_191223  
29 Description of data: see name of table  
30  
31 Table ST14 KEGG analysis for downregulated DEGs of subset A  
32 ST14\_DN\_EnrichR\_KEGG\_2021\_Human\_sbst7\_Ctr\_3D\_7d\_vs\_Ctr\_nconf\_191223  
33 Description of data: see name of table  
34  
35 Table ST15 KEGG analysis for downregulated DEGs of subset B  
36 File name: ST15\_DN\_EnrichR\_KEGG\_2021\_Human\_sbst7\_KO\_3D\_7d\_vs\_KO\_2D\_nconf\_191223  
37 ST15\_DN\_EnrichR\_KEGG\_2021\_Human\_sbst7\_KO\_3D\_7d\_vs\_KO\_2D\_nconf\_191223  
38 Description of data: see name of table  
39  
40 Table ST16 Shared DEGs of subset C and subset D  
41 File name: ST16\_Shared\_DEGs\_of\_subset\_C\_and\_D  
42 Description of data: Analyses of common and different DEGs of total, up-, and downregulated DEGs of  
43 subset C and D, including TOP 20 up- and downregulated DEGS.  
44

1 Table ST17 GO-BP enrichment analysis for upregulated DEGs of subset C  
2 File name: ST17\_UP\_EnrichR\_GO\_Biological\_Process\_2021\_sbst7\_KO\_3D\_7d\_vs\_Ctr\_3D\_7d\_191223  
3 Description of data: see name of table  
4  
5 Table ST18 GO-BP enrichment analysis for downregulated DEGs of subset C  
6 File name: ST18\_DN\_EnrichR\_GO\_Biological\_Process\_2021\_sbst7\_KO\_3D\_7d\_vs\_Ctr\_3D\_7d\_191223  
7 Description of data: see name of table  
8  
9 Table ST19 GO-BP enrichment analysis for upregulated DEGs of subset D  
10 File name:  
11 ST19\_UP\_EnrichR\_GO\_Biological\_Process\_2021\_sbst7\_KO\_2D\_nconf\_vs\_Ctr\_2D\_nconf\_140824.txt  
12 Description of data: see name of table  
13  
14 Table ST20 GO-BP enrichment analysis for downregulated DEGs of subset D  
15 File name:  
16 ST20\_DN\_EnrichR\_GO\_Biological\_Process\_2021\_sbst7\_KO\_2D\_nconf\_vs\_Ctr\_2D\_nconf\_140824.txt  
17 Description of data: see name of table  
18  
19 Table ST21 REACTOME analysis for upregulated DEGs of subset C  
20 File name: ST21\_UP\_EnrichR\_Reactome\_2016\_sbst7\_KO\_3D\_7d\_vs\_Ctr\_3D\_7d\_191223  
21 Description of data: see name of table  
22  
23 Table ST22 REACTOME analysis for downregulated DEGs of subset C  
24 File name: ST22\_DN\_EnrichR\_Reactome\_2016\_sbst7\_KO\_3D\_7d\_vs\_Ctr\_3D\_7d\_191223  
25 Description of data: see name of table  
26  
27 Table ST23 REACTOME analysis for upregulated DEGs of subset D  
28 File name: ST23\_UP\_EnrichR\_Reactome\_2016\_sbst7\_KO\_2D\_nconf\_vs\_Ctr\_2D\_nconf\_140824.txt  
29 Description of data: see name of table  
30  
31 Table ST24 REACTOME analysis for downregulated DEGs of subset D  
32 File name: ST24\_DN\_EnrichR\_Reactome\_2016\_sbst7\_KO\_2D\_nconf\_vs\_Ctr\_2D\_nconf\_140824.txt  
33 Description of data: see name of table  
34  
35 Table ST25 KEGG analysis for upregulated DEGs of subset C  
36 File name: ST25\_UP\_EnrichR\_KEGG\_2021\_Human\_sbst7\_KO\_3D\_7d\_vs\_Ctr\_3D\_7d\_191223  
37 Description of data: see name of table  
38  
39 Table ST26 KEGG analysis for upregulated DEGs of subset C  
40 File name: ST26\_DN\_EnrichR\_KEGG\_2021\_Human\_sbst7\_KO\_3D\_7d\_vs\_Ctr\_3D\_7d\_191223  
41 Description of data: see name of table  
42  
43 Table ST27 KEGG analysis for upregulated DEGs of subset D  
44 File name:  
45 ST27\_UP\_EnrichR\_KEGG\_2021\_Human\_sbst7\_KO\_2D\_nconf\_vs\_Ctr\_2D\_nconf\_140824.txt  
46 Description of data: see name of table

1 Table ST28 KEGG analysis for upregulated DEGs of subset D  
2 File name:  
3 ST27\_UP\_EnrichR\_KEGG\_2021\_Human\_sbst7\_KO\_2D\_nconf\_vs\_Ctr\_2D\_nconf\_140824.txt  
4 Description of data: see name of table  
5  
6 Table ST29 Gene lists: cell junction, cell polarity, and cell-ECM interaction  
7 File name:  
8 ST27\_UP\_EnrichR\_KEGG\_2021\_Human\_sbst7\_KO\_2D\_nconf\_vs\_Ctr\_2D\_nconf\_140824.txt  
9 Description of data: Basis for the three gene lists are gene included by known GO-terms.  
10 For the gene list cell junctions, we used the following GO terms: GO:0043296 (apical junction complex,  
11 Cellular Component), GO:0070160 (tight junction, Cellular Component), and GO:0005912 (adherens  
12 junction, Cellular Component). The gene list of cell polarity genes based on the GO-term GO:0007163  
13 (establishment or maintenance of cell polarity, Biological Process). For cell substrate interactions, cell  
14 adhesion or cell adhesion we used GO terms GO:0031589 ( cell-substrate adhesion, Biological Process),  
15 GO:0007160 (cell-matrix adhesion, Biological Process) and the GO:0033627 (cell adhesion mediated  
16 by integrin, Biological Process).  
17  
18  
19  
20
